# Supplementary material for: ClearF++: Improved Supervised Feature Scoring Using Feature Clustering in Class-Wise Embedding and Reconstruction
Source: MDPI journal article supplement (doi:10.3390/bioengineering10070824), 2023-07-10
Supplement: s1 [file s1]

# Supplementary Materials: ClearF++: Improved Supervised Feature Scoring using Feature Clustering in Class-wise Embedding and Reconstruction

Sehee Wang <sup>1</sup>, So Yeon Kim <sup>1,2</sup> and Kyung-Ah Sohn <sup>1,2\*</sup>

## 1. Supplementary Table

**Table S1.** List of the highest-scoring 50 genes in the ARSCH4 lung cancer dataset.

| Rank | Gene symbol | Rank score | Gene Description                                           |
|------|-------------|------------|------------------------------------------------------------|
| 1    | CREB3L1     | 99.2       | CAMP Responsive Element Binding Protein 3 Like 1           |
| 2    | SYDE1       | 95.7       | Synapse Defective Rho GTPase Homolog 1                     |
| 3    | EMILIN1     | 93.0       | Elastin Microfibril Interfacer 1                           |
| 4    | COL1A1      | 89.9       | Collagen Type I Alpha 1 Chain                              |
| 5    | SEC61A1     | 88.8       | SEC61 Translocon Subunit Alpha 1                           |
| 6    | CKAP4       | 87.0       | Cytoskeleton Associated Protein 4                          |
| 7    | LAMP1       | 84.2       | Lysosomal Associated Membrane Protein 1                    |
| 8    | TAF15       | 84.1       | TATA-Box Binding Protein Associated Factor 15              |
| 9    | CSPG4       | 83.4       | Chondroitin Sulfate Proteoglycan 4                         |
| 10   | TBX2        | 82.6       | T-Box Transcription Factor 2                               |
| 11   | ADD1        | 81.5       | Adducin 1                                                  |
| 12   | MXRA8       | 77.9       | Matrix Remodeling Associated 8                             |
| 13   | PTRF        | 76.9       | Caveolae Associated Protein 1                              |
| 14   | NUBP2       | 76.6       | NUBP Iron-Sulfur Cluster Assembly Factor 2, Cytosolic      |
| 15   | MRC2        | 76.4       | Mannose Receptor C Type 2                                  |
| 16   | ENG         | 74.5       | Endoglin                                                   |
| 17   | MYH9        | 73.4       | Myosin Heavy Chain 9                                       |
| 18   | POFUT2      | 72.9       | Protein O-Fucosyltransferase 2                             |
| 19   | TSTA3       | 72.4       | GDP-L-Fucose Synthase                                      |
| 20   | DBN1        | 70.6       | Drebrin 1                                                  |
| 21   | CAPG        | 68.6       | Capping Actin Protein, Gelsolin Like                       |
| 22   | WDR1        | 67.6       | WD Repeat Domain 1                                         |
| 23   | BSCL2       | 67.4       | BSCL2 Lipid Droplet Biogenesis Associated, Seipin          |
| 24   | FAM129B     | 67.2       | Niban Apoptosis Regulator 2                                |
| 25   | C12orf10    | 64.7       | MYG1 Exonuclease                                           |
| 26   | MAP4        | 63.4       | Microtubule Associated Protein 4                           |
| 27   | DPAGT1      | 61.5       | Dolichyl-Phosphate N-Acetylglucosaminephosphotransferase 1 |
| 28   | MYO9B       | 61.3       | Myosin IXB                                                 |
| 29   | CD320       | 59.4       | CD320 Molecule                                             |
| 30   | CDC42SE2    | 59.4       | CDC42 Small Effector 2                                     |
| 31   | SDC3        | 56.4       | Syndecan 3                                                 |
| 32   | EXOSC4      | 55.3       | Exosome Component 4                                        |
| 33   | FKBP10      | 55.1       | FKBP Prolyl Isomerase 10                                   |
| 34   | MMP14       | 55.1       | Matrix Metalloproteinase 14                                |
| 35   | MFSD5       | 54.1       | Major Facilitator Superfamily Domain Containing 5          |
| 36   | SCPEP1      | 53.4       | Serine Carboxypeptidase 1                                  |
| 37   | LOXL1       | 51.2       | Lysyl Oxidase Like 1                                       |
| 38   | ATP5D       | 50.4       | ATP Synthase F1 Subunit Delta                              |
| 39   | FTSJ1       | 49.9       | FtsJ RNA 2'-O-Methyltransferase 1                          |
| 40   | CALR        | 49         | Calreticulin                                               |

Continued on next page

**Table S1 – continued from previous page**

| Rank | Gene symbol | Rank score | Gene Description                                                                |
|------|-------------|------------|---------------------------------------------------------------------------------|
| 41   | SPNS1       | 47.3       | SPNS Lysolipid Transporter 1, Lysophospholipid                                  |
| 42   | DCXR        | 45.8       | Dicarbonyl And L-Xylulose Reductase                                             |
| 43   | WDR18       | 45.1       | WD Repeat Domain 18                                                             |
| 44   | MICAL2      | 44.8       | Microtubule Associated Monooxygenase, Calponin And LIM Do-<br>main Containing 2 |
| 45   | ARHGEF17    | 43.3       | Rho Guanine Nucleotide Exchange Factor 17                                       |
| 46   | NDST1       | 43.2       | N-Deacetylase And N-Sulfotransferase 1                                          |
| 47   | GPC1        | 41.8       | Glypican 1                                                                      |
| 48   | DPM2        | 41.2       | Dolichyl-Phosphate Mannosyltransferase Subunit 2, Regulatory                    |
| 49   | METTL3      | 40.5       | Methyltransferase 13, EEF1A Lysine And N-Terminal Methyl-<br>transferase        |
| 50   | P3H3        | 40         | Prolyl 3-Hydroxylase 3                                                          |

**Table S2.** Results of statistical significance tests between ClearF++ and three other methods: MultiSURF, IFS and ClearF, corresponding to the results presented in Table 1. The p-value was measured through a paired t-test between ClearF++ and other methods across three different datasets.

| n <sup>1</sup> | Colon                     |          |          | ALL/AML                   |          |          | ARCHS4                    |          |          |
|----------------|---------------------------|----------|----------|---------------------------|----------|----------|---------------------------|----------|----------|
|                | ClearF++ vs.<br>MultiSURF | IFS      | ClearF   | ClearF++ vs.<br>MultiSURF | IFS      | ClearF   | ClearF++ vs.<br>MultiSURF | IFS      | ClearF   |
| 15             | 2.43E-10                  | 2.22E-06 | 5.74E-09 | 5.46E-05                  | 1.00E-05 | 2.24E-05 | 8.73E-07                  | 5.24E-06 | 6.26E-04 |
| 30             | 2.41E-08                  | 1.41E-11 | 1.30E-01 | 2.46E-03                  | 3.46E-02 | 6.56E-05 | 3.06E-05                  | 1.02E-03 | 7.02E-07 |
| 45             | 4.15E-06                  | 3.52E-07 | 5.67E-07 | 6.62E-03                  | 9.36E-08 | 1.29E-05 | 9.30E-07                  | 9.39E-08 | 7.22E-06 |
| 60             | 3.14E-13                  | 2.54E-12 | 2.19E-03 | 6.23E-04                  | 2.69E-05 | 1.00E+00 | 4.64E-04                  | 1.03E-06 | 8.48E-08 |

<sup>1</sup>The number of features.
